# Supplementary material
Source: PubMed Central journal article supplement (PMC6030483)
Supplement: NIHMS968994-supplement-1.pdf [file NIHMS968994-supplement-1.pdf]

# Supplementary Figure S1.

A)

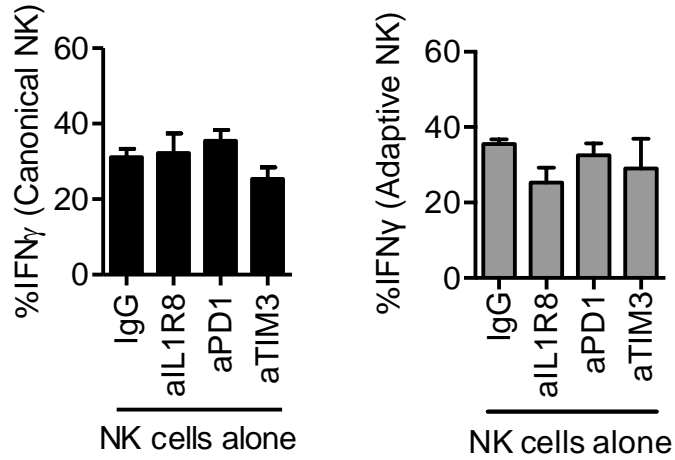

B)

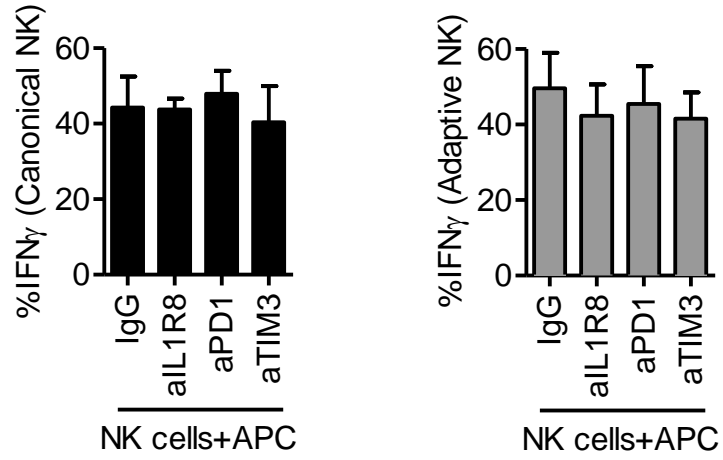

C)

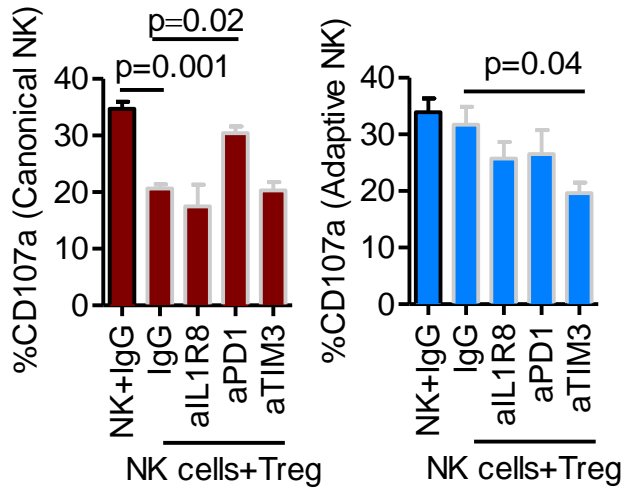

D)

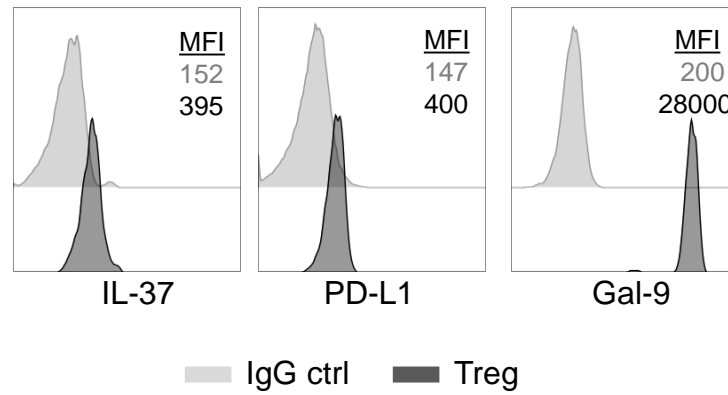

# Supplementary Figure S2.

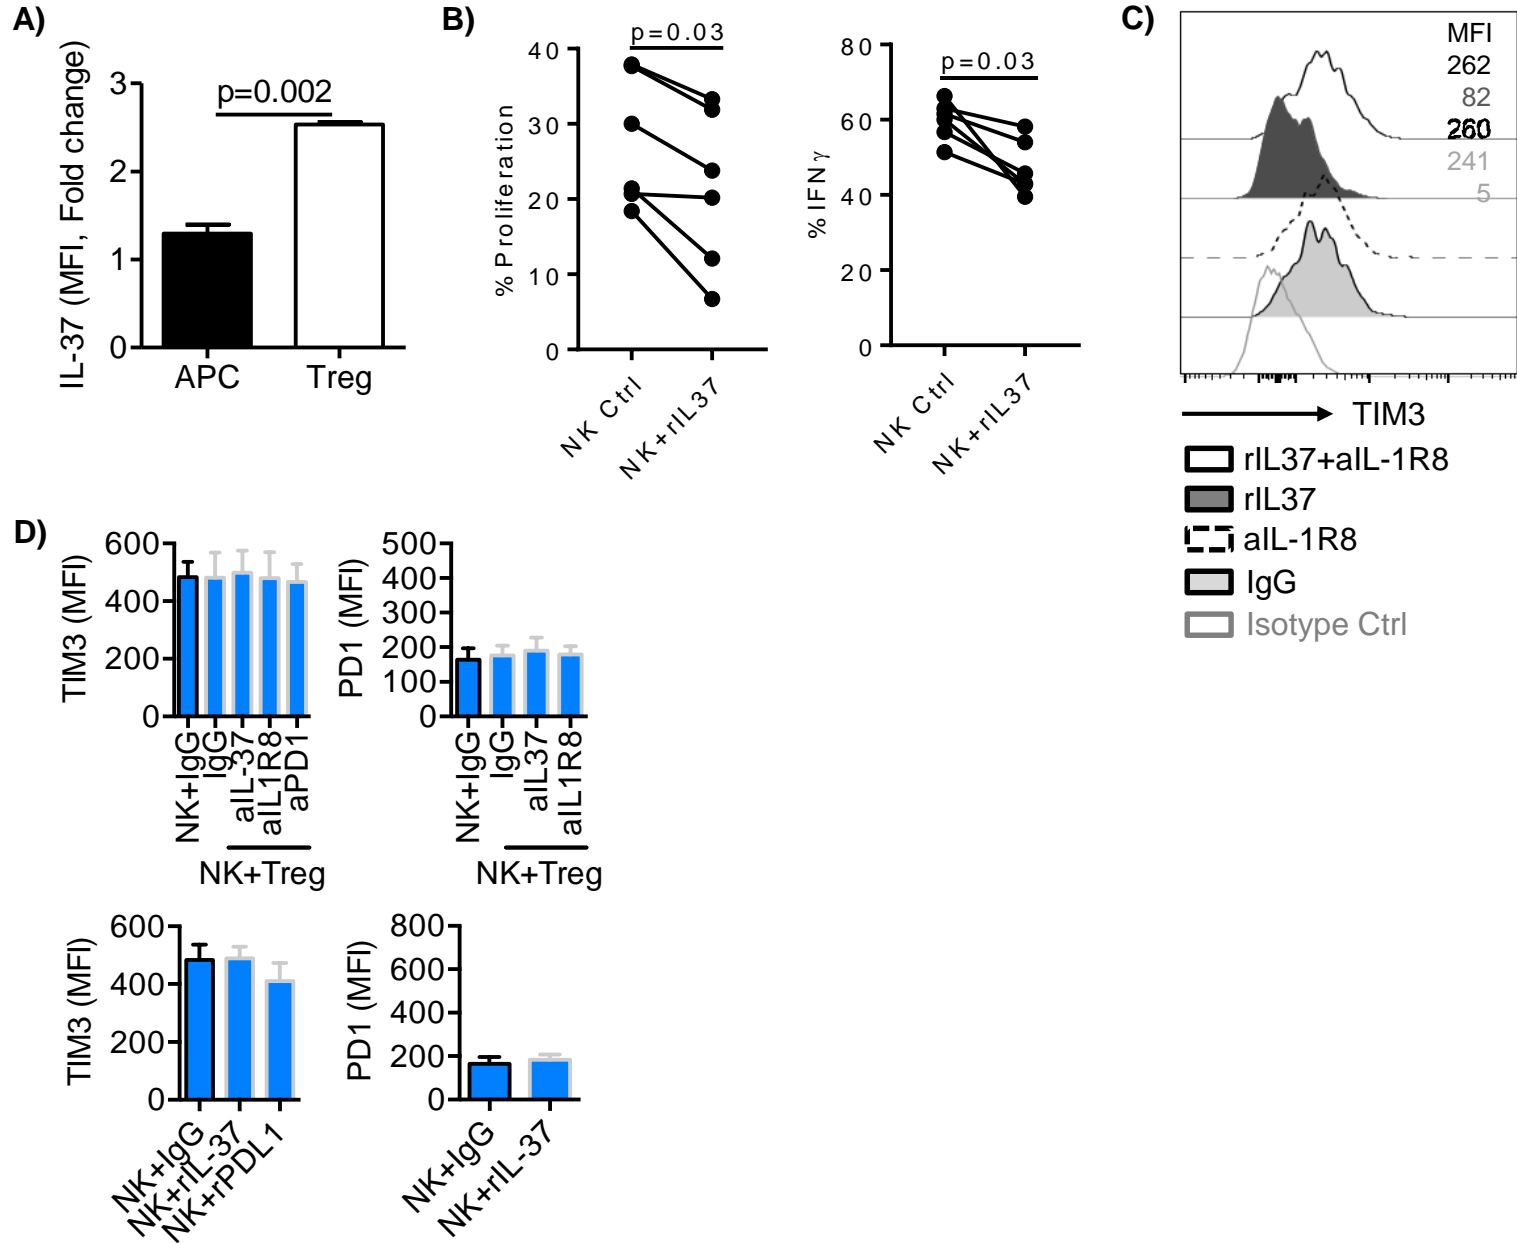

# Supplementary Figure S3.

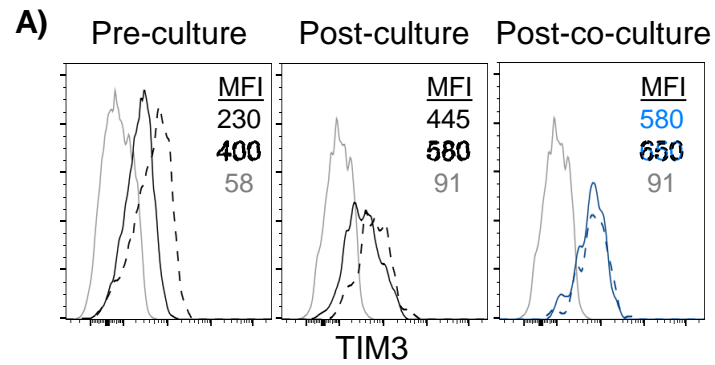

- Adaptive NK alone
- ▨ Adaptive NK alone+IL-12/18
- Adaptive NK+Treg
- ▩ Adaptive NK+Treg+IL-12/18
- IgG ctrl

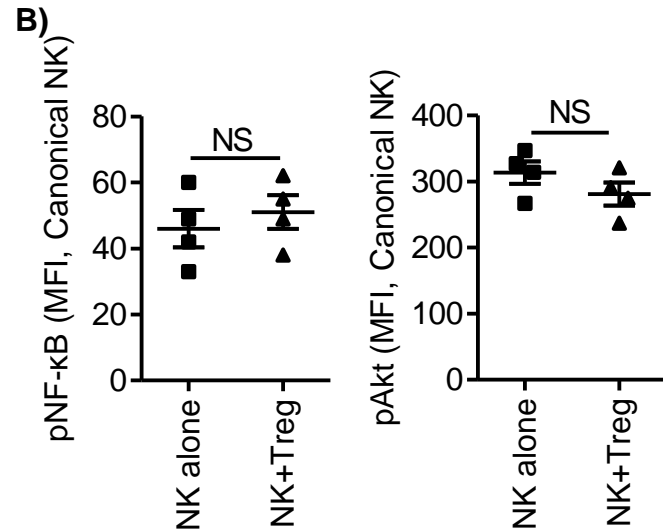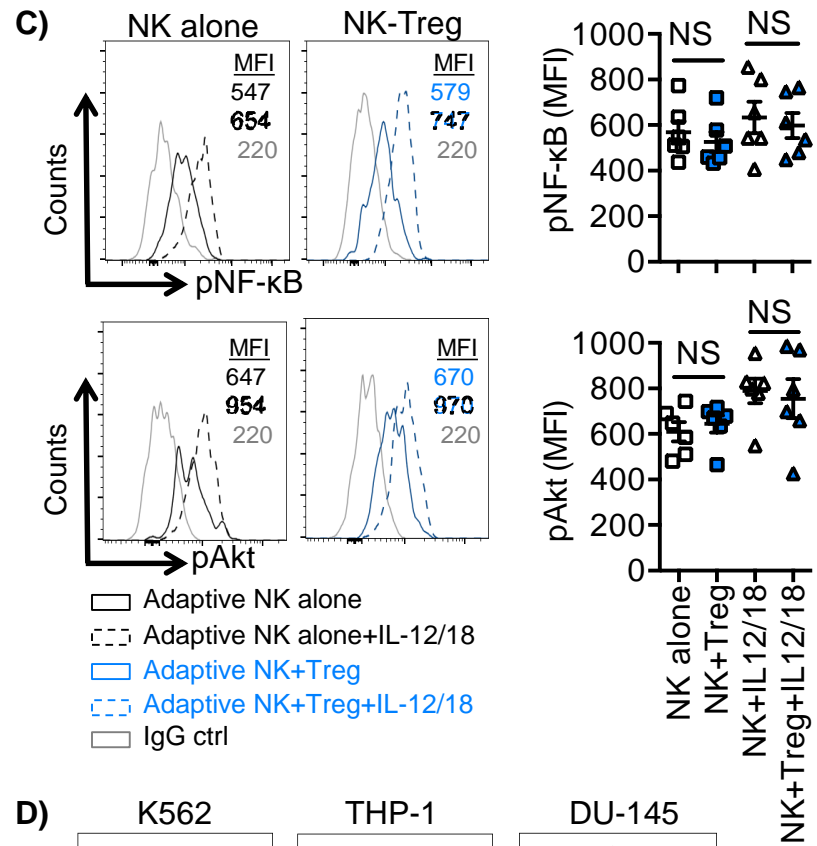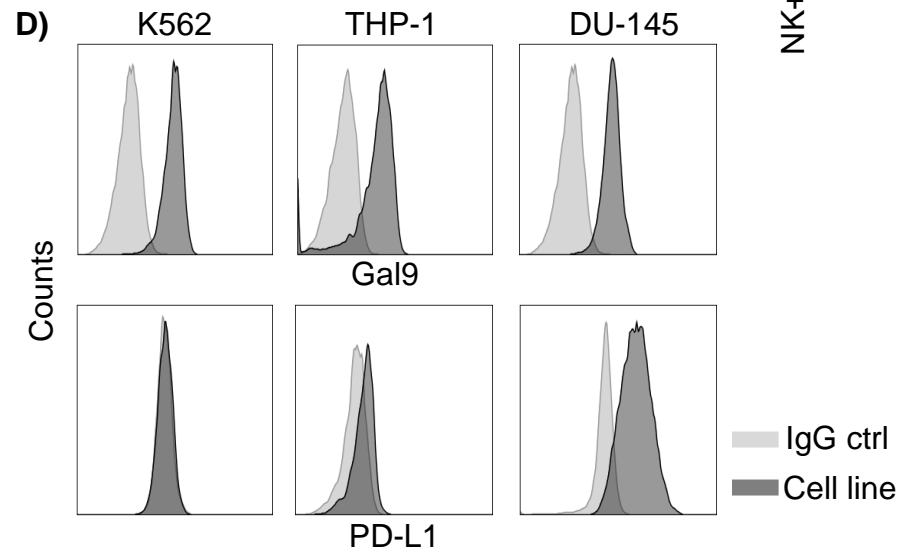

# Supplementary Figure S4.

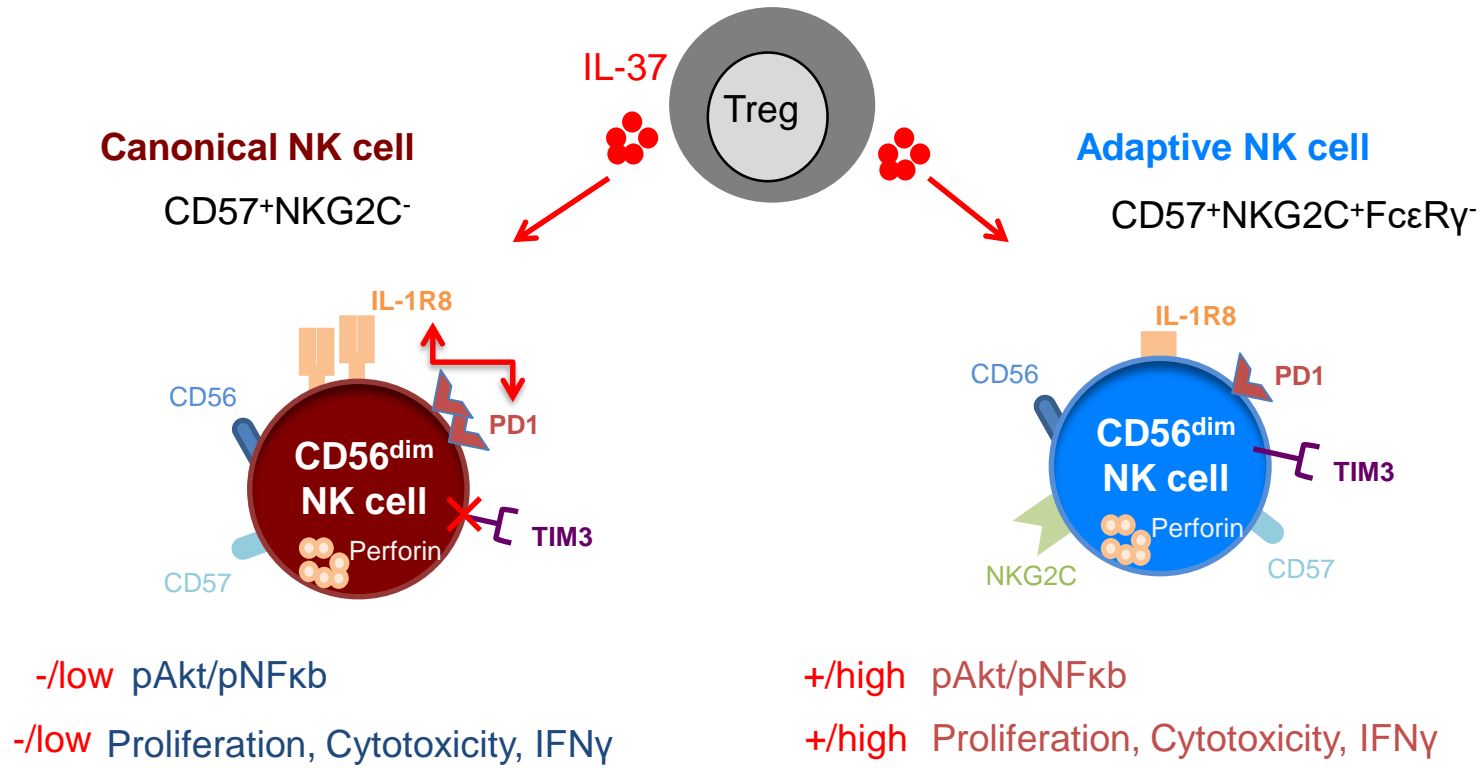

## Supplementary Table S1.

| Marker                     | Clone         | Fluorochrome           | Manufactory        |
|----------------------------|---------------|------------------------|--------------------|
| CD3                        | OKT3          | BV785                  | Biolegend          |
| CD56                       | NCAM          | PE/CY7                 | Biolegend          |
| CD57                       | NK-1          | BV605                  | BD Biosciences     |
| CD16                       | 3G8           | AF700                  | Biolegend          |
| NKp44                      | P44-8         | APC                    | BD Biosciences     |
| NKp46                      | 9E2           | PerCP-eFluor® 710      | BD Biosciences     |
| DNAM-1                     | 11A8          | APC                    | Biolegend          |
| NKG2A                      | Z199          | APC                    | Beckman Coulter    |
| TIGIT                      | 741182        | APC                    | R&D systems        |
| NKG2C                      | 134591        | PE                     | R&D systems        |
| FC $\epsilon$ R $\gamma$   | RB Polyclonal | FITC                   | EMD millipore      |
| PD-1                       | MIH4          | APC                    | eBiosciences       |
| PD-L1                      | 29E.2A3       | BV421                  | Biolegend          |
| TIM-3                      | F38-2E2       | BV421                  | Biolegend          |
| TIM-3                      | F38-2E2       | BV650                  | Biolegend          |
| IL-1R8                     | MAB975        | Primary monoclonal     | R&D systems        |
| Gal9                       | 9M1-3         | APC                    | Biolegend          |
| IL-37                      | 37D12         | PE                     | eBiosciences       |
| CD107a                     | H4A3          | PerCP/Cy5.5            | Biolegend          |
| IFN $\gamma$               | 4S.B3         | BV650                  | Biolegend          |
| Ki67                       | B56           | AF700                  | BD Biosciences     |
| CellTrace                  |               | Violet                 | Invitrogen         |
| Akt (pS473)                | M89-61        | BV421                  | BD Biosciences     |
| NF- $\kappa$ B p65 (pS529) | K10-895.12.50 | PE/CY7                 | BD Biosciences     |
| Fixable dead cell marker   |               | Near-IR                | Invitrogen         |
| <b>Blocking antibodies</b> | <b>Clone</b>  | <b>Isotype control</b> | <b>Manufactory</b> |
| Anti-IL-1R8                | MAB975        | IgG1                   | R&D systems        |
| Anti-TIM3                  | F38-2E2       | IgG1                   | Biolegend          |
| Anti-PD1                   | scFv anti-PD1 |                        | Beigene            |
| Anti-IL-37                 | MAB19751      | IgG2b                  | R&D systems        |

### **Supplementary Figure S1.**

Canonical and adaptive NK cells were cultured with with IL-2 (50 IU/ml) **A)** alone, **B)** with APCs (1:1), or **C)** APCs + Treg (Treg:NK, 1:2) in the presence of blocking antibodies against IL1R8, PD1, TIM3, or control IgG for 6 days. NK cell cultures were then stimulated with anti-CD16 antibody, and IL-12 and IL-18 for 6 hours prior to analysis of IFN- $\gamma$  production and degranulation (CD107a). Cumulative data ( $n = 4-7$ ) are shown from 3 independent experiments as mean  $\pm$  SEM. **D)** Expanded Tregs were stimulated with IL-2 (300 UI/ml) overnight and evaluated for the intracellular production of IL-37 and the expression of PD-L1 and Gal9. Representative ( $n = 5$ ) histograms are shown from two independent experiments.

### **Supplementary Figure S2.**

**A)** Purified APC ( $n=6$ ) and expanded Treg ( $n=6$ ) were stained for IL-37 following 6 hours treatment with transport inhibitors golgistop and golgiplug. Statistical analyses were performed on pooled MFI fold change calculated based on respective isotype control using Mann Whitney U-test. **B)** Purified NK cells ( $n=6$ ) were cultured in IL-2 (50 IU/ml) and recombinant IL-37 (3  $\mu\text{g/ml}$ ) for 6 days. IFN $\gamma$  production and proliferation of total NK cells were evaluated following stimulation with anti-CD16 antibody (1  $\mu\text{g/ml}$ ), IL-12 (5 ng/ml), and IL-18 (50 ng/ml) 6 hours prior to analysis. Pooled data are shown as mean  $\pm$  SEM and statistical analyses were performed by nonparametric Wilcoxon test. **C)** NK cells ( $n=4$ ) were co-cultured with, IL-2 (50 IU/ml) and APCs in the presence of control IgG, recombinant (r) IL-37, anti (a)-IL1R8, or rIL-37+a-IL1R8 and evaluated for TIM3

expression 6 days post-culture. One representative donor is shown. **D)** Adaptive NK cell TIM3 and PD-1 expression were analyzed following culture with APCs  $\pm$  Treg and in the presence of blocking antibodies against IL-37, IL-18, and PD-1 or IgG (*upper panel*). Adaptive NK cells in culture with APCs were treated with recombinant IL-37 (3  $\mu$ g/ml) or PD-L1 Fc chimera protein (10  $\mu$ g/ml) and evaluated for the expression of TIM3 and PD-1 expression after 6 days of culture (*lower panel*). Cumulative data ( $n = 6-8$ ) are shown from three independent experiments as mean  $\pm$  SEM.

### **Supplementary Figure S3.**

**A)** Purified NK ( $n = 6$ ) cells were co-cultured with APCs (1:1) overnight and stimulated with IL-12 (5 ng/ml) and IL-18 (50 ng/ml) to increase TIM3 or left unstimulated. Following overnight stimulation, cells were washed and cultured with IL-2 (50 IU/ml)  $\pm$  Treg (Treg:NK, 1:2) for 6 days. Representative histogram of TIM3 expression is shown before and after co-culture from two independent experiments. **B)** Purified NK cells were co-cultured with APCs with IL-2 (50 IU/ml)  $\pm$  Treg (Treg:NK, 1:2) for 6 days prior to analysis for the phosphorylation of NF- $\kappa$ B (pNF- $\kappa$ B) and Akt (pAkt). Cumulative data ( $n = 4$ ) are shown as mean  $\pm$  SEM. **C)** Following co-culture, adaptive NK cells were stimulated with soluble recombinant Gal9 (50 nM) for 20 min. prior analysis for the phosphorylation of NF- $\kappa$ B (pNF- $\kappa$ B) and Akt (pAkt). Representative and cumulative data are shown from two independent experiments. Cumulative data ( $n = 6-12$ ) are shown as mean  $\pm$  SEM. **D)** Tumor cell lines K562, THP-1, and DU-145 were analyzed for the

expression of Gal9 and PD-L1. Representative histograms are shown from two independent experiments.

**Supplementary Figure S4.**

Schematic summary.

**Supplementary Table S1.** Antibodies and fluorescent dyes used in the experiments.
